# Supplementary material
Source: Springer Nature journal article supplement (https://www.springermedizin.de/resource/supplementary/13075_2009_2700_MOESM3_ESM.pdf/9692678)

**A**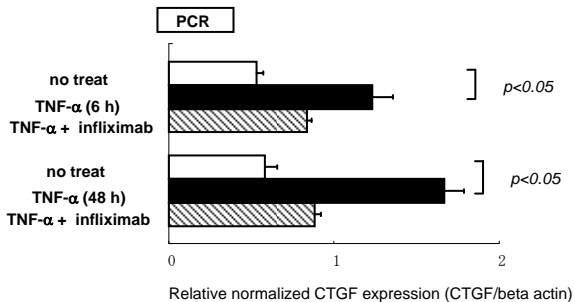**Immunoblotting**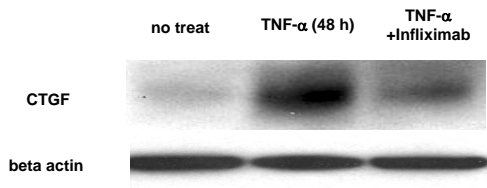**B**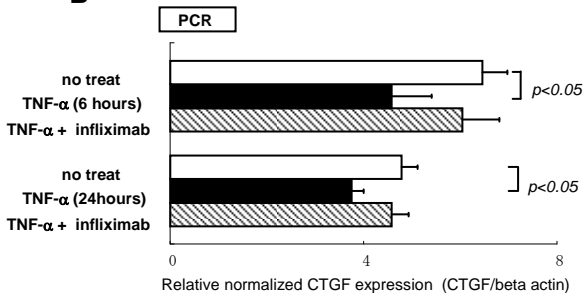**Immunoblotting**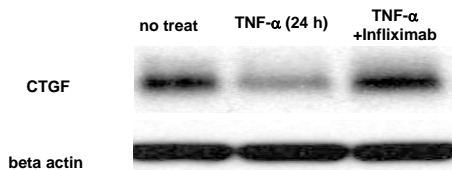

Supplement: MOESM3 [file 9692678]
